# Supplementary material for: Bimetallic Zn/Co telluride spinel with enhanced metal–tellurium covalency for efficient water oxidation
Source: Royal Society of Chemistry journal article supplement (doi:10.1039/d3cc02261g), 2023-01-01
Supplement: d3cc02261g1.pdf [file d3cc02261g1.pdf]

## Supporting Information

### **Bimetallic Zn/Co Telluride Spinel with Enhanced Metal-Tellurium Covalency for Efficient Water Oxidation**

Shuowen Bo,<sup>1,#</sup> Qizheng An,<sup>1,#</sup> Yu Zhu,<sup>1,#</sup> Xiuxiu Zhang,<sup>1</sup> Yuhao Zhang,<sup>1</sup> Hui-Juan Wang,<sup>3</sup> Juguang Han,<sup>1</sup> Hui Su,<sup>2,\*</sup> Qinghua Liu<sup>1,\*</sup>

<sup>1</sup>*National Synchrotron Radiation Laboratory, University of Science and Technology of China, Hefei 230029, Anhui, P. R. China;*

<sup>2</sup>*Key Laboratory of Light Energy Conversion Materials of Hunan Province College, College of Chemistry and Chemical Engineering, Hunan Normal University, Changsha 410081, Hunan, P. R. China*

<sup>3</sup>*Experimental Center of Engineering and Material Science, University of Science and Technology of China, Hefei 230026 China*

*#These authors contributed equally: Shuowen Bo, Qizheng An, Yu Zhu.*

*\*E-mail: suhui@ustc.edu.cn; qhliu@ustc.edu.cn*

#### **Contents:**

Materials and methods;

Supplementary Figs 1-11;

Supplementary Tables 1-3;

## Materials and methods

**Materials.**  $\text{Na}_2\text{TeO}_3$ ,  $\text{Co}(\text{NO}_3)_2 \cdot 6\text{H}_2\text{O}$ ,  $\text{CO}(\text{NH}_2)_2$ ,  $\text{NH}_4\text{F}$ ,  $\text{Zn}(\text{NO}_3)_2$ ,  $\text{C}_2\text{H}_5\text{OH}$ .  $\text{HCl}$  were purchased from Sinopharm Chemical Reagent Co. Ltd. Commercial  $\text{RuO}_2$  was purchased from Aladdin. All chemicals were used directly without further purification. Deionized water was used in all experiments.

**Synthesis of  $\text{ZnCo}_2\text{Te}_4/\text{NF}$  electrocatalyst.** The  $\text{ZnCo}_2\text{Te}_4$  electrocatalysts was fabricated in four convenience designed steps, consisting of surface functionalization of 3D nickel foam (NF), high temperature hydrothermal precursors synthesis, hydrothermal vulcanization synthesis, and room temperature-conventional drying. First, the 3D nickel foam was cleaned by ultrasound vibration at  $60\text{ }^\circ\text{C}$  for 4 h, then nickel foam was washed with concentrated nitric and deionized water. Next, chemical ratios of 2 mmol  $\text{Zn}(\text{NO}_3)_2 \cdot 6\text{H}_2\text{O}$ , 4 mmol  $\text{Co}(\text{NO}_3)_2 \cdot 6\text{H}_2\text{O}$ , 12 mmol  $\text{CO}(\text{NH}_2)_2$ , and  $\text{NH}_4\text{F}$  were mixed in 70 ml deionized water for 10 minutes, and the nickel foam and solution were put into a 45 ml polytetrafluoroethylene reactor, and the resulting mixed solution was dried at  $120\text{ }^\circ\text{C}$  for 8 h to obtain solid precursor, then the precursor was washed with deionized water and ethanol for 3 times. Next, the precursor was dried in a vacuum oven at  $60\text{ }^\circ\text{C}$  for 6 h. Subsequently, 0.05 mol of  $\text{Na}_2\text{TeO}_3$  was dissolved into 40 ml deionized water to form the solution, then the nickel foam was put in the solution. The resulting solution was put into a 45 ml polytetrafluoroethylene reactor. The resulting solution was heated at  $140\text{ }^\circ\text{C}$  for 6 h, then washed three times with deionized water and ethanol. Finally, the resulting product was wiped with lint-free paper, then cooled at room temperature until dry naturally.

### **Morphology and structure characterizations.**

The powder X-ray diffraction (XRD) patterns of samples were measured in a Philips X' Pert Pro Super X-ray diffractometer with Cu K $\alpha$  radiation ( $\lambda = 1.54178 \text{ \AA}$ ). Transmission electron microscopy (TEM), high-resolution transmission electron microscopy (HRTEM) and energy dispersive spectroscopy (EDS) were performed on a JEM-2100F microscope with an acceleration voltage of 200 kV. The field emission scanning electron microscopy (SEM) was acquired on a Gemini SEM 500 scanning electron microscope. X-ray photoelectron spectroscopy (XPS) spectra were acquired on an ESCALAB MKII with Mg K $\alpha$  ( $h\nu = 1253.6 \text{ eV}$ ) as the excitation source. The Co K-edge X-ray absorption near-edge spectra (XANES) were measured in National Synchrotron Radiation Laboratory (NSRL), which were measured in the total electron yield mode in a vacuum chamber ( $< 5 \times 10^{-8} \text{ Pa}$ ). Inductively coupled plasma mass spectrometry (ICP-OES) was measured by using Inductively Coupled Plasma Optic Emission Spectrometer (Plasma Quad 3). Specific surface area (BET) was measured in a fully automatic surface area and porosity analyzer (Tristar II 3020M)

**Electrochemical Measurements.** All electrochemical measurements were performed in a three-electrode system by CHI760D electrochemical work station, operated with the self-supporting array grown on NF (the active area of  $1 \times 1 \text{ cm}^2$ ) as the working electrodes, carbon electrode as the counter electrode, and the normal Hg/Hg<sub>2</sub>Cl<sub>2</sub> electrode as the reference electrode. The three electrodes were immersed in 1M KOH as conductive media. All final potentials were converted to reversible hydrogen electrode (RHE) with the conversion  $E \text{ (vs. RHE)} = E \text{ (vs. Hg/Hg}_2\text{Cl}_2) + 0.245 \text{ V} + 0.059 \times \text{pH}$ . Linear sweep voltammetry (LSV) curves were obtained at a rate of  $5 \text{ mV s}^{-1}$  with IR correction after several cyclic voltammetry tests until stable. It is worth noting that electrochemical data were corrected for uncompensated series resistance  $R_s$ , which was determined through the open-circuit voltage, and we selected 90% IR compensation to obtain  $R_s$ . And the potential was determined by the following

$$\text{Eq: } E_{\text{Corrected}} = E_{\text{Uncorrected}} - I \cdot R_s$$

### **Mathematical formula for electrochemical measurements:**

**The roughness factor (RF) mathematical formula.** The roughness factor (RF) was calculated by taking the estimated ECSA and  $S_{geo}$ , as following Eq.

$$RF = ECSA / S_{geo}$$

**The ECSA mathematical formula.** The ECSA of the catalyst sample was calculated from the double layer capacitance according to the following Eq.

$$ECSA = C_{dl} / C_s$$

where  $C_s$  is the specific capacitance of the sample, and the typical value reported ranges between  $C_s = 0.02-0.06$  mF/cm<sup>2</sup> in KOH, then we selected general specific capacitances of  $C_s = 0.04$  mF/cm<sup>2</sup>.

based typical reported. Furthermore, to gain reliable data, we performed CV tests at a wide redox process-free window of 300 mV and suitable sweep speeds of 0.005, 0.01, 0.02, 0.05, 0.1, 0.5, 0.8, 1 V/s.

**The  $J_{ECSA}$  mathematical formula.** The definition of specific activity refers to the specific current density  $J_{ECSA}$ , which was calculated as according to the following Eq.

$$J_{ECSA} = J_{geo} / RF$$

**The turnover frequency (TOF) and mass activity mathematical formula.**

$$TOF = \frac{\text{the measured current density } j \cdot NA \cdot 1000}{4 \cdot F \cdot mol}$$

$$MA \text{ (mass activity)} = \frac{j}{m}$$

The TOF and MA are activity metric reported in the electrocatalysis literature, which are depended on a given overpotential and the measured current density. It is assumed that every active metal atom of the catalyst participates in the reaction. The turnover frequency (TOF, s<sup>-1</sup>) can be calculated according to the equation:  $TOF = (j \times A) / (4 \times F \times M)$ , where  $j$  is the current density at a given potential,  $A$  is the surface of the electrode,  $F$  is the faradaic constant, and  $M$  is the number of moles of active metal on

the electrode. The mass activity can be calculated according to the equation: Mass activity =  $(j \times A) / m$ , where  $j$  is the current density at a given potential,  $A$  is the surface of the electrode, and  $m$  is the active metal loading mass on the electrode.

#### **XAFS measurements.**

The XAFS measurements of Co  $K$ -edge were carried out at the 1W1B station in the Beijing Synchrotron Radiation Facility (BSRF), China. The storage ring of BSRF was operated at 2.5 GeV with a maximum current of 250 mA. The beam from the bending magnet was monochromatized utilizing a Si (111) double-crystal monochromator. The data collection was carried out in transmission mode using ionization chamber for Co foil, and in transmission mode for  $\text{Co}_3\text{O}_4$ ,  $\text{CoOOH}$ ,  $\text{ZnCo}_2\text{Te}_4$ .

#### ***In-situ* SRIR measurement.**

*In-situ* synchrotron radiation IR measurements were made at the infrared beamline BL01B of the National Synchrotron Radiation Laboratory (NSRL, China), and we performed electrochemical tests through a homemade top-plate cell to obtain better signal data. Specifically, in order to reduce the loss of infrared light and eliminate the effect of vibration absorption of water molecules, the catalyst electrode was tightly pressed against the ZnSe crystal window with a micron-scale gap. Attentively, during the *in-situ* SRIR measurements, the infrared signal is very sensitive to water molecules and it is easily disturbed. To obtain improved-infrared signal-to-noise ratio (SNR), we pressed the electrode and window to control the thickness of the water film on the micron scale. To avoid signal differences caused by sample shedding, infrared spectra were collected after a constant potential was applied to the catalyst electrode for 5 min. Before each systemic OER measurement, the background spectrum of the electrocatalyst electrode was acquired without applied voltage and the measure potential ranges of the OER were 1.2–1.6 V with an interval of 0.1 V.



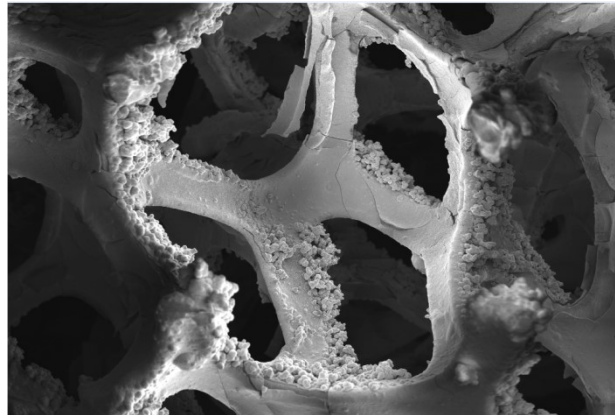

**Fig. S1** The SEM image of catalyst on nickel foam

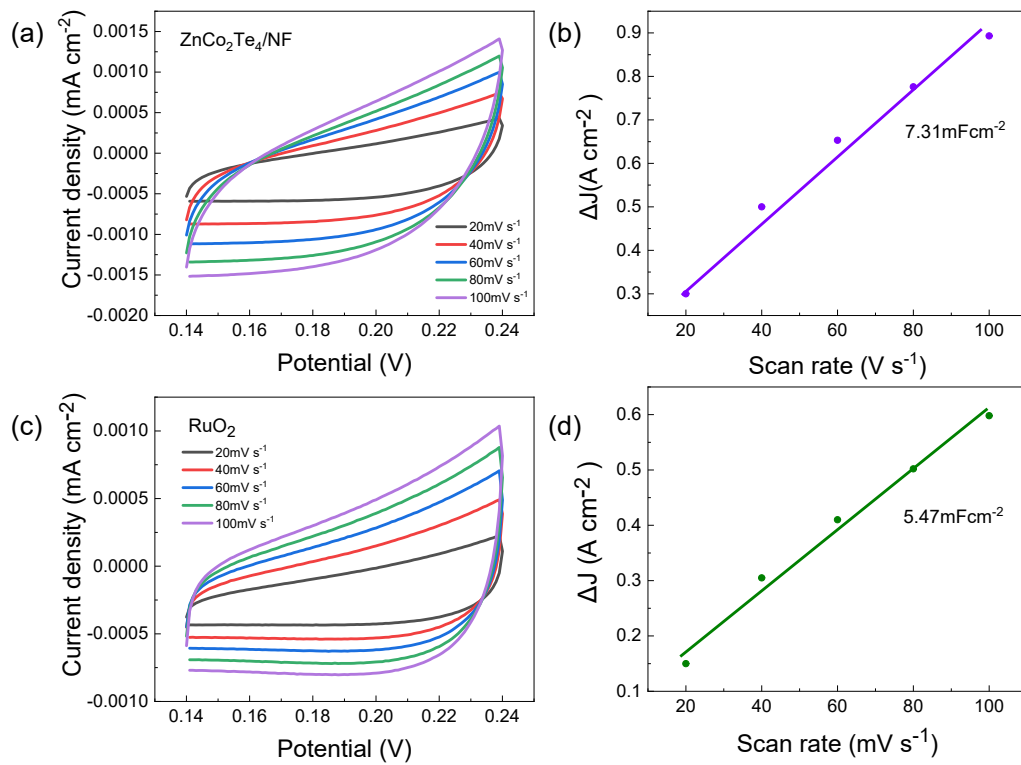

**Fig. S2** Double-layer capacitance ( $C_{dl}$ ) measurements. (a) and (c) CVs were conducted in a non-Faradaic region at the following scan rate: 20, 40, 60, 80, 100 mV s<sup>-1</sup>. (b) and (d) The difference in charging currents variation at a potential plotted against scan rate for estimation of double-layer capacitance.

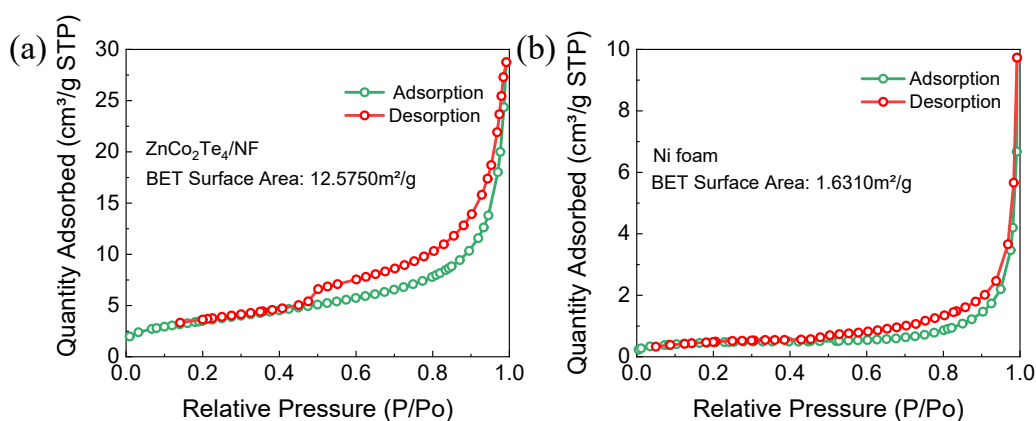

**Fig. S3** Isotherm adsorption curve and specific surface area of (a) ZnCo<sub>2</sub>Te<sub>4</sub>/NF and (b) Ni foam. The BET result shows that ZnCo<sub>2</sub>Te<sub>4</sub>/NF catalyst (Fig. S2a) possesses the high specific surface area. In order to avoid the influence of NF, we carry out the BET test of pure NF as well, and the result is displayed in supporting information as Fig. S2b from which the specific surface area is 1.6310 m<sup>2</sup>/g, suggesting the high specific surface area originating the ZnCo<sub>2</sub>Te<sub>4</sub> catalyst, not the NF.



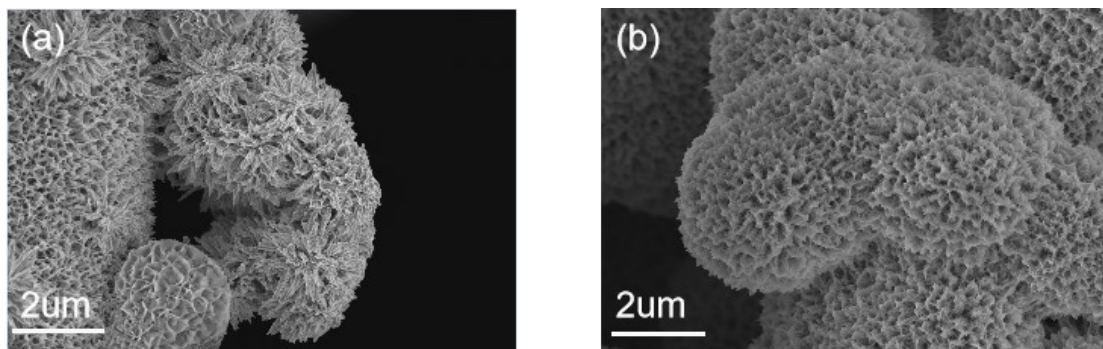

**Fig. S4** (a) The SEM image before OER reaction and (b) SEM image after OER reaction

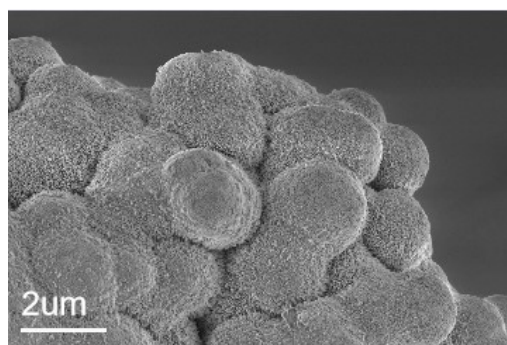

**Fig. S5** The SEM image after 50h durability test

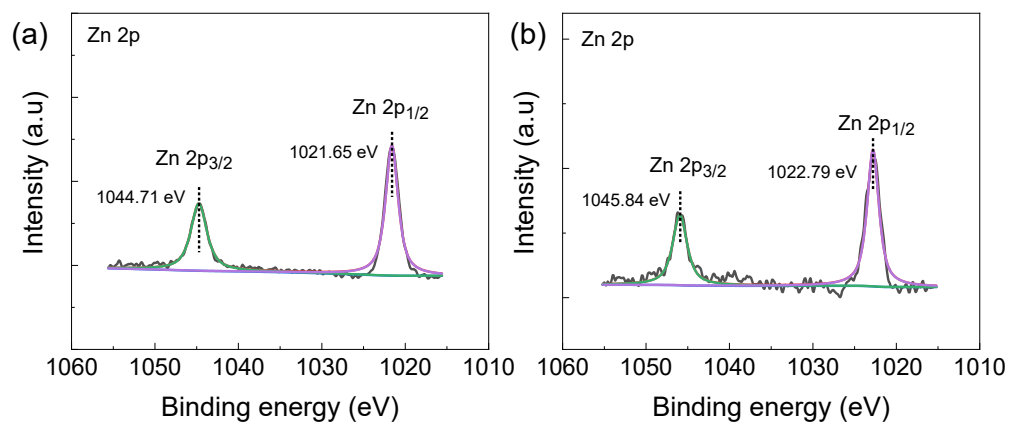

**Fig. S6** The Zn 2p XPS survey spectra of ZnCo<sub>2</sub>Te<sub>4</sub>/NF electrocatalysts before and after OER

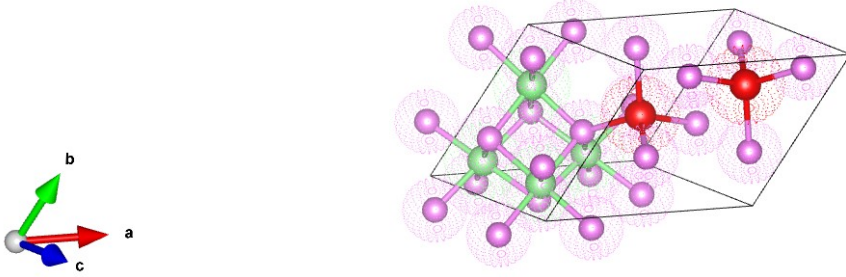

**Fig. S7** The Crystal structure diagram of ZnCo<sub>2</sub>Te<sub>4</sub>

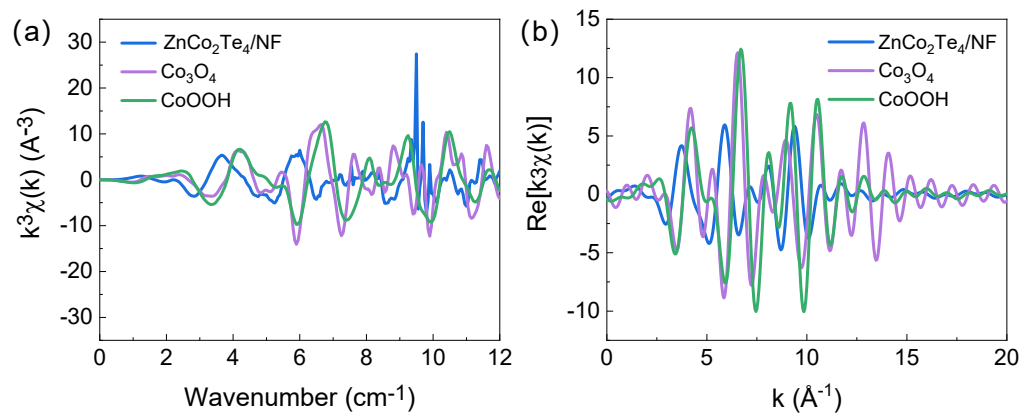

**Fig. S8** The Co K-edge k space and q space oscillation curves for ZnCo<sub>2</sub>Te<sub>4</sub>/NF

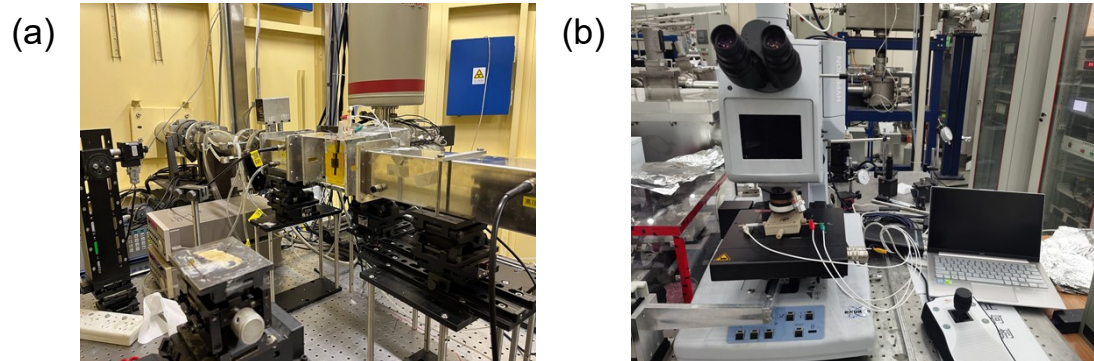

**Fig. S9** Optical images of (a) XAS and (b) Operando SR-FTIR measurement.

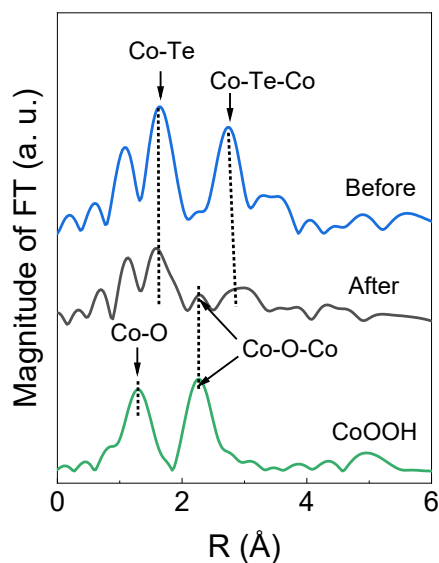

**Fig. S10** Corresponding  $k^3$ -weighted Fourier transform (FT) spectra of  $\text{ZnCo}_2\text{Te}_4/\text{NF}$  before and after OER reaction and reference sample  $\text{CoOOH}$ .

*Importantly, covalent bonds can serve as a bridge for electron transfer between Co and Te to facilitate the reaction. In order to further ensure whether Co-Te could maintain during the reaction, we carry out the ICP and XAFS experiments. Noted that the dissolution of  $\text{Co}^{3+}$  is slight detected over 10h (Tables S3), suggesting the Co-Te covalency bonding is not broke. For more directly demonstrating the presence of Co-Te in the reaction, XAFS results of catalyst after reaction is analyzed (Fig. S10) from which the evident signal of Co-Te appears after the reaction. These evidences strongly illustrates that the strong covalent bond contributing to the enhancement of OER performance accompanies the whole reaction process*

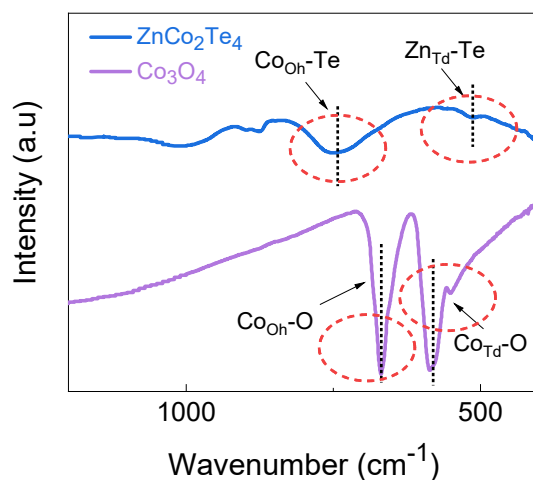

**Fig. S11** The infrared spectroscopy of  $\text{ZnCo}_2\text{Te}_4$ ,  $\text{Co}_3\text{O}_4$ .

Fourier infrared spectroscopy (Fig. 2b) detects the signal of Zn-Te and Co-Te bondings, suggesting the existence of covalent bonds in  $\text{ZnCo}_2\text{Te}_4/\text{NF}$ . In order to clear the real activity origin, it is necessary to identify the effect of Zn-Te bonding. With the stronger Lewis acidity, Zn ions would more easily dissolve than Co ions. Inspired by this principle, we employ the inductively coupled plasma atomic emission spectroscopy analysis, and the results are displayed in Table N1. The rapid dissolution of Zn sites means Zn-Te bondings are hard to maintain, and the reinforced effect originating from Zn-Te is not sufficient.

**Tables.S1** ICP-OES results of  $\text{ZnCo}_2\text{Te}_4$

| <b>Samples</b>             | <b>Zn (wt%)</b> | <b>Co(wt%)</b> | <b>Te (wt%)</b> |
|----------------------------|-----------------|----------------|-----------------|
| $\text{ZnCo}_2\text{Te}_4$ | 9.4             | 17.07          | 73.51           |



**Table S2.** Comparison of alkaline OER performance for ZnCo<sub>2</sub>Te<sub>4</sub>/NF as well as other electrocatalysts reported in the literatures.

| Catalysts                                                                       | Media   | Performance                                         | Reference |
|---------------------------------------------------------------------------------|---------|-----------------------------------------------------|-----------|
| ZnCo <sub>2</sub> Te <sub>4</sub> /NF                                           | 1 M KOH | $E_{\text{over}}=370\text{mV}@100\text{mA cm}^{-2}$ | This work |
| g-Co <sub>3</sub> O <sub>4</sub>                                                | 1 M KOH | $E_{\text{over}}=354\text{mV}@100\text{mA cm}^{-2}$ | [1]       |
| Ir-NiCo <sub>2</sub> O <sub>4</sub>                                             | 1 M KOH | $E_{\text{over}}=500\text{mV}@100\text{mA cm}^{-2}$ | [2]       |
| CuCo <sub>2</sub> O <sub>4</sub> /Ti <sub>3</sub> C <sub>2</sub> T <sub>x</sub> | 1 M KOH | $E_{\text{over}}=440\text{mV}@100\text{mA cm}^{-2}$ | [3]       |
| NiCo <sub>2</sub> O <sub>4</sub> @Ni-MOF                                        | 1 M KOH | $E_{\text{over}}=340\text{mV}@100\text{mA cm}^{-2}$ | [4]       |
| CoFe <sub>2</sub> O <sub>4</sub>                                                | 1 M KOH | $E_{\text{over}}=300\text{mV}@100\text{mA cm}^{-2}$ | [5]       |
| m-NiCo <sub>2</sub> O <sub>4</sub>                                              | 1 M KOH | $E_{\text{over}}=383\text{mV}@100\text{mA cm}^{-2}$ | [6]       |
| Co <sub>2-x</sub> V <sub>x</sub> O <sub>4</sub>                                 | 1 M KOH | $E_{\text{over}}=280\text{mV}@100\text{mA cm}^{-2}$ | [7]       |
| MNFO NS/IF                                                                      | 1 M KOH | $E_{\text{over}}=281\text{mV}@100\text{mA cm}^{-2}$ | [8]       |
| MnFe <sub>2</sub> O <sub>4</sub>                                                | 1 M KOH | $E_{\text{over}}=330\text{mV}@100\text{mA cm}^{-2}$ | [9]       |

**Table S3** ICP-OES results of ZnCo<sub>2</sub>Te<sub>4</sub> catalyst during OER process

| <b>Metal Concentration</b> | 1h      | 2h      | 5h      | 7h      | 10h     |
|----------------------------|---------|---------|---------|---------|---------|
| <b>Zn<sup>2+</sup></b>     | 5.6wt%  | 13.3wt% | 19.8wt% | 21.1wt% | 23.2wt% |
| <b>Co<sup>3+</sup></b>     | 0.98wt% | 1.07wt% | 1.23wt% | 1.35wt% | 2.42wt% |

## Reference

1. L. Qi, M. Wang and X. Li, *CrystEngComm*, 2021, **23**, 7928-7931.
2. H.-J. Lee, D.-H. Park, W.-J. Lee, S.-B. Han, M.-H. Kim, J.-H. Byeon and K.-W. Park, *Applied Catalysis A: General*, 2021, **626**.
3. S. Ghorbanzadeh, S. A. Hosseini and M. Alishahi, *Journal of Alloys and Compounds*, 2022, **920**.
4. Z. Dai, X. Du and X. Zhang, *International Journal of Hydrogen Energy*, 2022, **47**, 17252-17262.
5. B. Debnath, S. Parvin, H. Dixit and S. Bhattacharyya, *ChemSusChem*, 2020, DOI: 10.1002/cssc.202000932.
6. A. Amirzhanova, N. Akmanşen, I. Karakaya and Ö. Dag, *ACS Applied Energy Materials*, 2021, **4**, 2769-2785.
7. C. Jiang, J. Yang, X. Han, H. Qi, M. Su, D. Zhao, L. Kang, X. Liu, J. Ye, J. Li, Z.-X. Guo, N. Kaltsoyannis, A. Wang and J. Tang, *ACS Catalysis*, 2021, **11**, 14884-14891.
8. Y. Peng, L. Sun, X. Yue and S. Huang, *ACS Applied Energy Materials*, 2022, **5**, 15239-15246.
9. M. Chen, N. Kitiphatpiboon, C. Feng, Q. Zhao, A. Abudula, Y. Ma, K. Yan and G. Guan, *Applied Catalysis B: Environmental*, 2023, **330**.
